# Supplementary material
Source: PubMed Central journal article supplement (PMC1993858)
Supplement: neo0909_0734SD1.pdf [file neo0909_0734SD1.pdf]

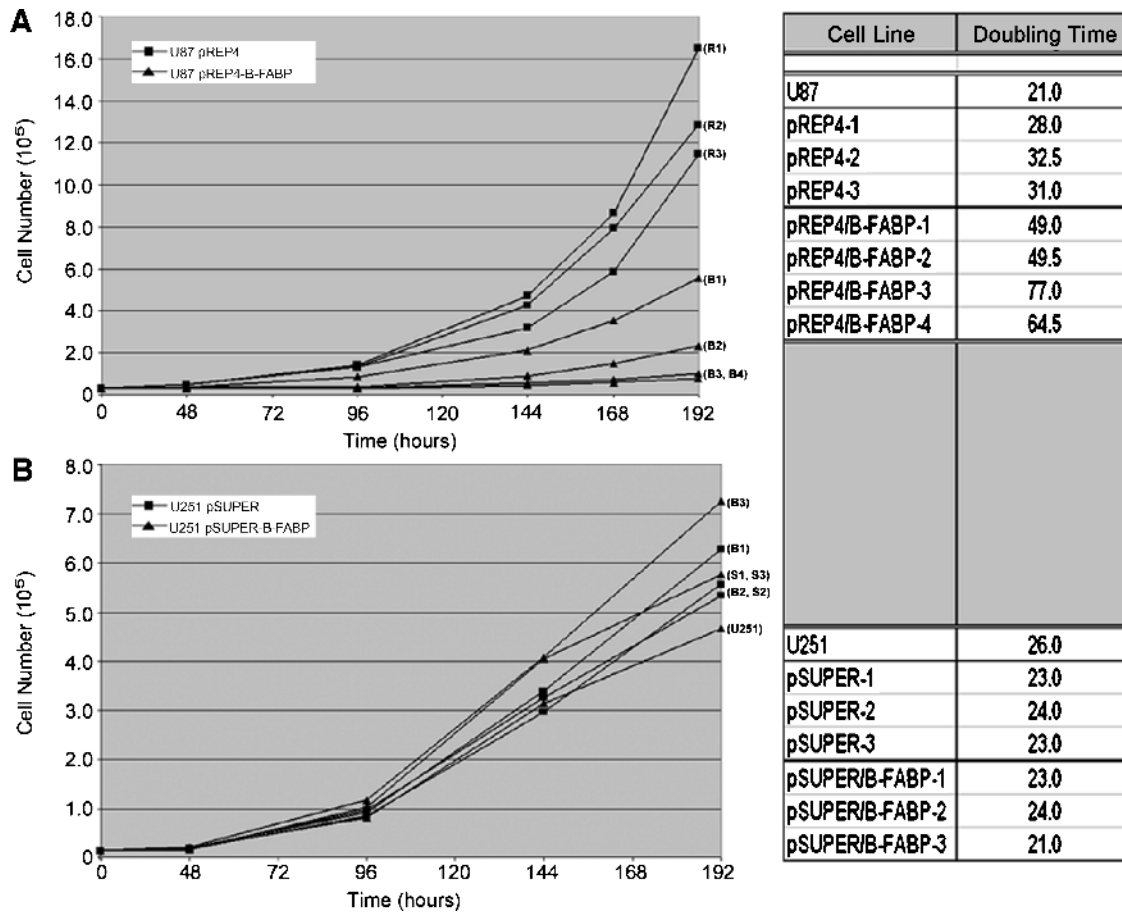

**Figure W1.** Proliferation of U87- and U251-transfected cells. U87 control and B-FABP-expressing transfectants (A) and U251 control and U251-depleted transfectants (B) were seeded at 15,000 cells/35-mm culture dish. Cells from triplicate plates were counted using a Coulter Particle and Size Analyzer (Beckman Coulter, Fullerton, CA) at 48, 96, 144, 168, and 192 hours after plating. Growth curves were generated using the average of triplicate plates at each time point. Doubling times were obtained using the exponential phase of the growth curves.

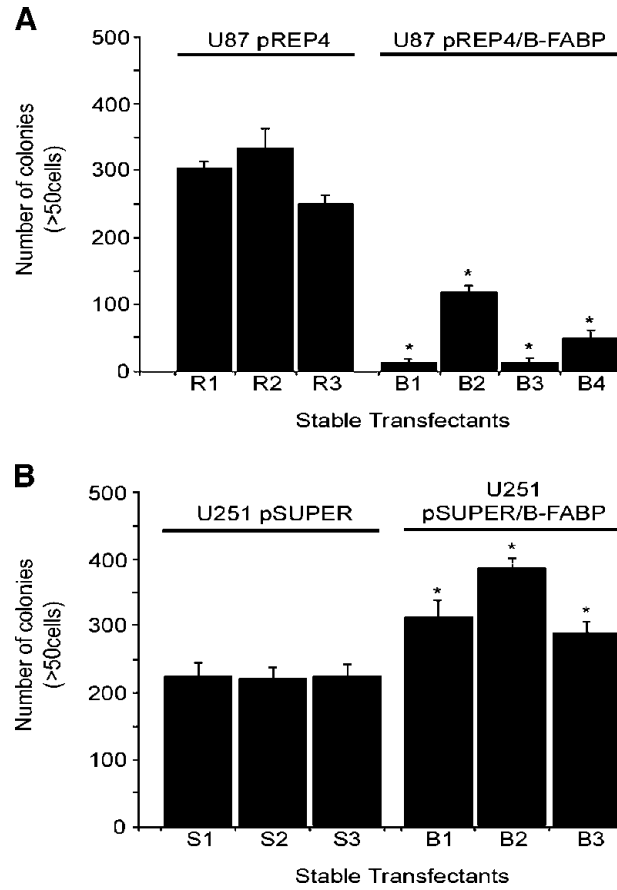

**Figure W2.** Growth of U87 and U251 transfectants in soft agar. U87 pREP4 control and pREP4/B-FABP transfectants (A) and U251 pSUPER control and pSUPER/B-FABP transfectants (B) were plated in quadruplicate at  $10^3$  and  $10^4$  cells/dish. Colonies (> 50 cells) were counted after 4 weeks of incubation using a Nikon Diaphot 300 light microscope with a 4 $\times$  objective (Nikon, Tokyo, Japan). Error bars indicate SEM.
